# Supplementary material for: Sphingosine Kinase-1 Involves the Inhibitory Action of HIF-1α by Chlorogenic Acid in Hypoxic DU145 Cells
Source: MDPI journal article supplement (doi:10.3390/ijms18020325), 2017-02-04
Supplement: s1 [file s1]

# Supplementary Materials: Sphingosine Kinase-1 Involves the Inhibitory Action of HIF-1 $\alpha$ by Chlorogenic Acid in Hypoxic DU145 Cells

Myoung-Sun Lee, Seon-Ok Lee, Kyu-Ri Kim and Hyo-Jeong Lee

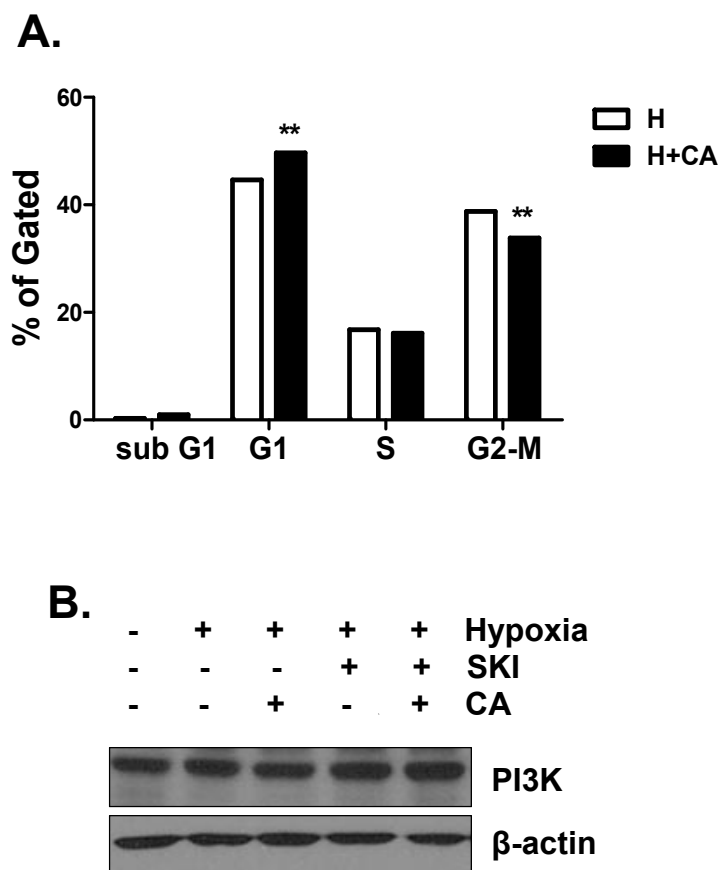

**Figure S1.** (A) CA (50  $\mu$ M) was treated in hypoxia-induced DU145 cells for 3 days. Cell cycle distribution was analyzed by flow cytometry. Bar graphs represent the percentage of sub-G1, G1, S, G2-M phase cells. Data represent mean  $\pm$  SD. \*\*  $p < 0.01$  compared with hypoxia control. (H, hypoxia; CA, chlorogenic acid); (B) PI3K levels by CA on hypoxia-induced DU145 cells. DU145 cells were treated without or with CA and SKI under hypoxia for 4 h. Levels of PI3K was determined by western blot analysis.
